# Supplementary material for: How Clustered DNA Damage Can Change the Electronic Properties of ds-DNA—Differences between GAG, GAOXOG, and OXOGAOXOG
Source: MDPI journal article supplement (doi:10.3390/biom13030517), 2023-03-11
Supplement: s1 [file s1]

**Table S1.** The energies (in Hartree) of Neural, Vertical Cation ( $VC^{NE}$ ) (NE-non-equilibrated), Vertical Cation ( $VC^{EQ}$ ) (EQ-equilibrated), Vertical Anion ( $VA^{NE}$ ), Vertical Anion ( $VA^{EQ}$ ), Adiabatic Cation (AC), Adiabatic Anion (AA) and Vertical Neutral from Cation ( $VNC^{NE}$ ), Vertical Neutral from Cation ( $VNC^{EQ}$ ), Vertical Neutral from Anion ( $VNA^{NE}$ ), Vertical Neutral from Anion ( $VNA^{EQ}$ ) of complete DNA double helix and base pairs skeleton extracted from *ds*-oligonucleotides calculated at the M06-2x/6-31+G\*\* and M06-2x/6-31++G\*\* level of theory in the aqueous phase, respectively.

|                                                                | Neutral      | $VC^{NE}$ | $VC^{EQ}$ | $VA^{NE}$ | $VA^{EQ}$    | AC         | AA           | $VNC^{NE}$   | $VNC^{EQ}$   | $VNA^{NE}$   | $VNA^{EQ}$   |
|----------------------------------------------------------------|--------------|-----------|-----------|-----------|--------------|------------|--------------|--------------|--------------|--------------|--------------|
| Complete DNA double helix                                      |              |           |           |           |              |            |              |              |              |              |              |
| oligo-G                                                        | -12776,3427  | -12776,10 | -12776,1  | -12776,37 | -12776,40072 | -12776,135 | -12776,41959 | -12776,30422 | -12776,32834 | -12776,29604 | -12776,32187 |
| oligo- <sup>o</sup> G                                          | -12851,5718  | -12851,33 | -12851,4  | -12851,60 | -12851,62442 | -12851,374 | -12851,64682 | -12851,5356  | -12851,55903 | -12851,52334 | -12851,54879 |
| oligo- <sup>o</sup> G <sup>o</sup> G                           | -12926,7992  | -12926,56 | -12926,6  | -12926,83 | -12926,8577  | -12926,601 | -12926,8759  | -12926,7627  | -12926,78621 | -12926,75207 | -12926,77740 |
| Base Pairs skeleton extracted from <i>ds</i> -oligonucleotides |              |           |           |           |              |            |              |              |              |              |              |
| oligo-G                                                        | -4638,177641 | -4637,94  | -4637,96  | -4638,2   | -4638,226832 | -4637,9727 | -4638,247303 | -4638,15103  | -4638,163199 | -4638,15     | -4638,16     |
| oligo- <sup>o</sup> G                                          | -4713,405801 | -4713,18  | -4713,19  | -4713,428 | -4713,455462 | -4713,2082 | -4713,475657 | -4713,388742 | -4713,39119  | -4713,379418 | -4713,38     |
| oligo- <sup>o</sup> G <sup>o</sup> G                           | -4788,633204 | -4788,40  | -4788,41  | -4788,656 | -4788,684321 | -4788,4349 | -4788,703127 | -4788,607882 | -4788,618409 | -4788,60561  | -4788,61     |

**Table S2.** Hirshfeld charge and spin distribution in the shape of *ds*-oligonucleotides, only nucleosides bases were taken into consideration, calculated at the M06-2x/6-31++G\*\* level of theory in the aqueous phase. Vertical Cation (VC<sup>NE</sup>) (NE-non-equilibrated), Vertical Cation (VC<sup>EQ</sup>) (EQ-equilibrated), Vertical Anion (VA<sup>NE</sup>), Vertical Anion (VA<sup>EQ</sup>), Adiabatic Cation (AC), Adiabatic Anion (AA) and Vertical Neutral from Cation (VNC<sup>NE</sup>), Vertical Neutral from Cation (VNC<sup>EQ</sup>), Vertical Neutral from Anion (VNA<sup>NE</sup>), Vertical Neutral from Anion (VNA<sup>EQ</sup>)

| oligo-G                                      |                  |                  |                  |                  |        |        |                   |                   |                   |
|----------------------------------------------|------------------|------------------|------------------|------------------|--------|--------|-------------------|-------------------|-------------------|
|                                              | Neutral          | VC <sup>NE</sup> |                  | VC <sup>EQ</sup> |        | AC     |                   | VNC <sup>NE</sup> | NVC <sup>EQ</sup> |
|                                              | Charge           | Charge           | Spin             | Charge           | Spin   | Charge | Spin              | Charge            | Charge            |
| A <sub>1</sub> T <sub>5</sub>                | -0.03            | 0.03             | 0.03             | 0.08             | 0.07   | 0.10   | 0.06              | -0.02             | -0.01             |
| G <sub>2</sub> C <sub>4</sub>                | 0.03             | 0.39             | 0.39             | 0.85             | 0.90   | 0.84   | 0.92              | 0.04              | 0.01              |
| A <sub>3</sub> T <sub>3</sub>                | -0.03            | 0.08             | 0.09             | 0.02             | 0.02   | 0.03   | 0.02              | -0.02             | -0.03             |
| G <sub>4</sub> C <sub>2</sub>                | 0.04             | 0.47             | 0.48             | 0.07             | 0.02   | 0.05   | 0.00              | 0.03              | 0.04              |
| A <sub>5</sub> T <sub>1</sub>                | -0.01            | 0.03             | 0.01             | -0.01            | 0.00   | -0.01  | 0.00              | -0.03             | -0.01             |
| oligo- <sup>o</sup> G                        |                  |                  |                  |                  |        |        |                   |                   |                   |
| A <sub>1</sub> T <sub>5</sub>                | -0.02            | 0.00             | 0.00             | -0.01            | 0.00   | -0.01  | 0.00              | 0.00              | -0.01             |
| G <sub>2</sub> C <sub>4</sub>                | 0.02             | 0.04             | 0.00             | 0.04             | 0.00   | 0.04   | 0.00              | 0.03              | 0.03              |
| A <sub>3</sub> T <sub>3</sub>                | -0.02            | 0.08             | 0.09             | 0.07             | 0.06   | 0.07   | 0.05              | -0.01             | -0.01             |
| <sup>oxo</sup> G <sub>4</sub> C <sub>2</sub> | 0.02             | 0.80             | 0.89             | 0.85             | 0.91   | 0.83   | 0.93              | -0.02             | 0.00              |
| A <sub>5</sub> T <sub>1</sub>                | 0.00             | 0.07             | 0.02             | 0.06             | 0.02   | 0.06   | 0.02              | 0.00              | -0.01             |
| oligo- <sup>o</sup> G <sup>o</sup> G         |                  |                  |                  |                  |        |        |                   |                   |                   |
| A <sub>1</sub> T <sub>5</sub>                | -0.01            | 0.07             | 0.03             | 0.01             | 0.03   | 0.01   | 0.00              | -0.01             | 0.00              |
| <sup>oxo</sup> G <sub>2</sub> C <sub>4</sub> | 0.000            | 0.43             | 0.48             | 0.43             | 0.47   | 0.13   | 0.10              | 0.01              | 0.01              |
| A <sub>3</sub> T <sub>3</sub>                | -0.01            | 0.10             | 0.09             | 0.10             | 0.09   | 0.08   | 0.05              | 0.01              | 0.00              |
| <sup>oxo</sup> G <sub>4</sub> C <sub>2</sub> | 0.03             | 0.38             | 0.39             | 0.41             | 0.41   | 0.73   | 0.83              | 0.01              | 0.00              |
| A <sub>5</sub> T <sub>1</sub>                | 0.00             | 0.04             | 0.01             | 0.03             | 0.01   | 0.06   | 0.02              | -0.02             | -0.01             |
| oligo-G                                      |                  |                  |                  |                  |        |        |                   |                   |                   |
|                                              | VA <sup>NE</sup> |                  | VA <sup>EQ</sup> |                  | AA     |        | VNA <sup>NE</sup> | NVA <sup>EQ</sup> |                   |
|                                              | Charge           | Spin             | Charge           | Spin             | Charge | Spin   | Charge            | Charge            |                   |
| A <sub>1</sub> T <sub>5</sub>                | -0.05            | 0.00             | -0.04            | 0.00             | -0.02  | 0.00   | -0.01             | -0.02             |                   |
| G <sub>2</sub> C <sub>4</sub>                | 0.01             | 0.01             | 0.01             | 0.02             | 0.01   | 0.00   | 0.02              | 0.01              |                   |
| A <sub>3</sub> T <sub>3</sub>                | -0.11            | 0.06             | -0.16            | 0.11             | -0.09  | 0.02   | -0.05             | -0.04             |                   |
| G <sub>4</sub> C <sub>2</sub>                | -0.70            | 0.83             | -0.61            | 0.70             | -0.82  | 0.94   | 0.02              | 0.05              |                   |
| A <sub>5</sub> T <sub>1</sub>                | -0.15            | 0.10             | -0.21            | 0.17             | -0.08  | 0.04   | 0.01              | -0.01             |                   |
| oligo- <sup>o</sup> G                        |                  |                  |                  |                  |        |        |                   |                   |                   |
| A <sub>1</sub> T <sub>5</sub>                | -0.04            | 0.00             | -0.02            | 0.00             | -0.02  | 0.00   | -0.01             | -0.02             |                   |
| G <sub>2</sub> C <sub>4</sub>                | -0.01            | 0.02             | 0.00             | 0.02             | 0.01   | 0.00   | 0.02              | 0.01              |                   |
| A <sub>3</sub> T <sub>3</sub>                | -0.11            | 0.07             | -0.15            | 0.11             | -0.09  | 0.02   | -0.04             | -0.04             |                   |
| <sup>oxo</sup> G <sub>4</sub> C <sub>2</sub> | -0.71            | 0.81             | -0.66            | 0.74             | -0.82  | 0.94   | 0.02              | 0.04              |                   |
| A <sub>5</sub> T <sub>1</sub>                | -0.14            | 0.09             | -0.17            | 0.14             | -0.07  | 0.03   | 0.02              | 0.00              |                   |
| oligo- <sup>o</sup> G <sup>o</sup> G         |                  |                  |                  |                  |        |        |                   |                   |                   |
| A <sub>1</sub> T <sub>5</sub>                | -0.09            | 0.06             | -0.01            | 0.00             | -0.01  | 0.00   | -0.00             | -0.01             |                   |
| <sup>oxo</sup> G <sub>2</sub> C <sub>4</sub> | -0.22            | 0.22             | -0.02            | 0.01             | -0.02  | 0.00   | 0.00              | -0.01             |                   |
| A <sub>3</sub> T <sub>3</sub>                | -0.15            | 0.13             | -0.11            | 0.08             | -0.08  | 0.02   | -0.03             | -0.03             |                   |
| <sup>oxo</sup> G <sub>4</sub> C <sub>2</sub> | -0.45            | 0.52             | -0.70            | 0.79             | -0.81  | 0.94   | 0.02              | 0.05              |                   |
| A <sub>5</sub> T <sub>1</sub>                | -0.10            | 0.06             | -0.16            | 0.12             | -0.07  | 0.03   | 0.02              | 0.01              |                   |

**Table S3.** The energies (in Hartree) of Neural, Vertical Cation, Adiabatic Cation and Vertical Neutral forms of base pairs extracted from *ds*-oligonucleotides calculated at the M06-2x/6-31++G\*\* level of theory in the aqueous phase.

|                                         | Neutral        | Vertical Cation        | Adiabatic Cation        | Vert Neutral        |
|-----------------------------------------|----------------|------------------------|-------------------------|---------------------|
| <b>oligo-G</b>                          |                |                        |                         |                     |
| <b>A<sub>1</sub>T<sub>5</sub></b>       | -921,191682    | -920,947308            | -920,949073             | -921,19147          |
| <b>G<sub>2</sub>C<sub>4</sub></b>       | -937,252595    | -937,027434            | -937,038223             | -937,240567         |
| <b>A<sub>3</sub>T<sub>3</sub></b>       | -921,192489    | -920,948177            | -920,949811             | -921,192176         |
| <b>G<sub>4</sub>C<sub>2</sub></b>       | -937,252759    | -937,027507            | -937,028165             | -937,252764         |
| <b>A<sub>5</sub>T<sub>1</sub></b>       | -921,191961    | -920,944427            | -920,945028             | -921,192194         |
| <b>oligo-G</b>                          |                | <b>Vertical Anion</b>  | <b>Adiabatic Anion</b>  | <b>Vert Neutral</b> |
| <b>A<sub>1</sub>T<sub>5</sub></b>       |                | -921,243655            | -921,243963             | -921,191767         |
| <b>G<sub>2</sub>C<sub>4</sub></b>       |                | -937,307348            | -937,306719             | -937,25153          |
| <b>A<sub>3</sub>T<sub>3</sub></b>       |                | -921,243775            | -921,24406              | -921,192473         |
| <b>G<sub>4</sub>C<sub>2</sub></b>       |                | -937,308484            | -937,324241             | -937,233582         |
| <b>A<sub>5</sub>T<sub>1</sub></b>       |                | -921,244136            | -921,243109             | -921,190968         |
|                                         |                |                        |                         |                     |
| <b>oligo-<sup>0</sup>G</b>              | <b>Neutral</b> | <b>Vertical Cation</b> | <b>Adiabatic Cation</b> | <b>Vert Neutral</b> |
| <b>A<sub>1</sub>T<sub>5</sub></b>       | -921,191848    | -920,948067            | -920,94861              | -921,191884         |
| <b>G<sub>2</sub>C<sub>4</sub></b>       | -937,251538    | -937,024955            | -937,025162             | -937,251507         |
| <b>A<sub>3</sub>T<sub>3</sub></b>       | -921,19218     | -920,94745             | -920,94771              | -921,192126         |
| <b>G<sub>4</sub>C<sub>2</sub></b>       | -1012,478383   | -1012,261293           | -1012,274085            | -1012,465472        |
| <b>A<sub>5</sub>T<sub>1</sub></b>       | -921,192039    | -920,944573            | -920,946723             | -921,19222          |
| <b>oligo-<sup>0</sup>G</b>              |                | <b>Vertical Anion</b>  | <b>Anion</b>            | <b>Vert Neutral</b> |
| <b>A<sub>1</sub>T<sub>5</sub></b>       |                | -921,244334            | -921,244284             | -921,191793         |
| <b>G<sub>2</sub>C<sub>4</sub></b>       |                | -937,306431            | -937,306562             | -937,251406         |
| <b>A<sub>3</sub>T<sub>3</sub></b>       |                | -921,243124            | -921,243402             | -921,192323         |
| <b>G<sub>4</sub>C<sub>2</sub></b>       |                | -1012,53476            | -1012,550605            | -1012,458617        |
| <b>A<sub>5</sub>T<sub>1</sub></b>       |                | -921,244425            | -921,24351              | -921,191203         |
|                                         |                |                        |                         |                     |
| <b>oligo-<sup>0</sup>G<sup>0</sup>G</b> | <b>Neutral</b> | <b>Vertical Cation</b> | <b>Adiabatic Cation</b> | <b>Vert Neutral</b> |
| <b>A<sub>1</sub>T<sub>5</sub></b>       | -921,191698    | -920,947423            | -920,948228             | -921,191759         |
| <b>G<sub>2</sub>C<sub>4</sub></b>       | -1012,476983   | -1012,258891           | -1012,25895             | -1012,476979        |
| <b>A<sub>3</sub>T<sub>3</sub></b>       | -921,192189    | -920,947935            | -920,947765             | -921,192186         |
| <b>G<sub>4</sub>C<sub>2</sub></b>       | -1012,47839    | -1012,261184           | -1012,274135            | -1012,465399        |
| <b>A<sub>5</sub>T<sub>1</sub></b>       | -921,19209     | -920,944778            | -920,946598             | -921,192154         |
| <b>oligo-<sup>0</sup>G<sup>0</sup>G</b> |                | <b>Vertical Anion</b>  | <b>Anion</b>            | <b>Vert Neutral</b> |
| <b>A<sub>1</sub>T<sub>5</sub></b>       |                | -921,243959            | -921,244043             | -921,19165          |
| <b>G<sub>2</sub>C<sub>4</sub></b>       |                | -1012,532389           | -1012,532423            | -1012,476736        |
| <b>A<sub>3</sub>T<sub>3</sub></b>       |                | -921,243165            | -921,243122             | -921,192013         |
| <b>G<sub>4</sub>C<sub>2</sub></b>       |                | -1012,53476            | -1012,550638            | -1012,458849        |
| <b>A<sub>5</sub>T<sub>1</sub></b>       |                | -921,244562            | -921,243653             | -921,191277         |

**Table S4.** The energy barriers (in eV) for radical cation migration between base pairs within trimers. Vertical (**Vert**) mode, i.e. the energies of each base pair's radical cation, which were calculated for their neutral geometry. Adiabatic (**Adia**) mode i.e. the energies of each base pair's radical cation were calculated for their cation geometry. Arrows indicate direction of Electron-hole or Excess Electron Transfer from one base pair to another e.g.,  $A^+ \rightarrow G$  calculated at M06-2x/6-31++G\*\* level of theory in the aqueous phase.

| Electron-hole transfer   |      |                      |                           |                              |                               |                          |                           |                          |                           |
|--------------------------|------|----------------------|---------------------------|------------------------------|-------------------------------|--------------------------|---------------------------|--------------------------|---------------------------|
|                          |      | $A_1 \leftarrow G_2$ | $A_1 \rightarrow G_2$     | $G_2 \leftarrow A_3$         | $G_2 \rightarrow A_3$         | $A_3 \leftarrow G_4$     | $A_3 \rightarrow G_4$     | $G_4 \leftarrow A_5$     | $G_4 \rightarrow A_5$     |
| oligo-G                  | Vert | 1,14                 | -0,47                     | -0,47                        | 1,14                          | 0,54                     | -0,47                     | -0,60                    | 0,62                      |
|                          | Adia | 0,77                 | -0,77                     | -0,77                        | 0,77                          | 0,49                     | -0,49                     | -0,61                    | 0,61                      |
|                          |      | $A_1 \leftarrow G_2$ | $A_1 \rightarrow {}^oG_2$ | ${}^oG_2 \leftarrow A_3$     | ${}^oG_2 \rightarrow A_3$     | $A_3 \leftarrow G_4$     | $A_3 \rightarrow G_4$     | $G_4 \leftarrow A_5$     | $G_4 \rightarrow A_5$     |
| oligo- ${}^oG$           | Vert | 0,47                 | -0,45                     | -0,49                        | 0,50                          | 1,45                     | -0,74                     | -0,77                    | 1,53                      |
|                          | Adia | 0,46                 | -0,46                     | -0,49                        | 0,49                          | 1,09                     | -1,09                     | -1,09                    | 1,12                      |
|                          |      | $A_1 \leftarrow G_2$ | $A_1 \rightarrow {}^oG_2$ | ${}^oG_2 \leftarrow A_3$     | ${}^oG_2 \rightarrow A_3$     | $A_3 \leftarrow {}^oG_4$ | $A_3 \rightarrow {}^oG_4$ | ${}^oG_4 \leftarrow A_5$ | ${}^oG_4 \rightarrow A_5$ |
| oligo- ${}^oG^oG$        | Vert | 0,71                 | -0,69                     | -0,72                        | 0,71                          | 1,44                     | -0,74                     | -0,77                    | 1,53                      |
|                          | Adia | 0,69                 | -0,69                     | -0,72                        | 0,72                          | 1,09                     | -1,09                     | -1,12                    | 1,12                      |
| Excess electron transfer |      |                      |                           |                              |                               |                          |                           |                          |                           |
|                          |      | $A_1 \leftarrow A_3$ | $A_1 \rightarrow A_3$     | $G_2 \leftarrow G_4$         | $G_2 \rightarrow G_4$         | $A_3 \leftarrow A_5$     | $A_3 \rightarrow A_5$     |                          |                           |
| oligo-G                  | Vert | 0,05                 | 0,05                      | 0,02                         | 0,30                          | -0,07                    | 0,04                      |                          |                           |
|                          | Adia | 0,00                 | 0,00                      | -0,28                        | 0,28                          | -0,12                    | 0,12                      |                          |                           |
|                          |      | $A_1 \leftarrow A_3$ | $A_1 \rightarrow A_3$     | ${}^oG_2 \leftarrow G_4$     | ${}^oG_2 \rightarrow G_4$     | $A_3 \leftarrow A_5$     | $A_3 \rightarrow A_5$     |                          |                           |
| oligo- ${}^oG$           | Vert | -0,02                | 0,01                      | 0,61                         | -0,25                         | -0,02                    | 0,01                      |                          |                           |
|                          | Adia | -0,03                | 0,03                      | 0,60                         | -0,60                         | -0,02                    | 0,02                      |                          |                           |
|                          |      | $A_1 \leftarrow A_3$ | $A_1 \rightarrow A_3$     | ${}^oG_2 \leftarrow {}^oG_4$ | ${}^oG_2 \rightarrow {}^oG_4$ | $A_3 \leftarrow A_5$     | $A_3 \rightarrow A_5$     |                          |                           |
| oligo- ${}^oG^oG$        | Vert | 0,00                 | 0,02                      | 0,38                         | -0,02                         | 0,32                     | 0,43                      |                          |                           |
|                          | Adia | 0,03                 | 0,03                      | 0,37                         | -0,37                         | -0,03                    | 0,03                      |                          |                           |
| Excess electron transfer |      |                      |                           |                              |                               |                          |                           |                          |                           |
|                          |      | $A_1 \leftarrow G_2$ | $A_1 \rightarrow G_2$     | $G_2 \leftarrow A_3$         | $G_2 \rightarrow A_3$         | $A_3 \leftarrow G_4$     | $A_3 \rightarrow G_4$     | $G_4 \leftarrow A_5$     | $G_4 \rightarrow A_5$     |
| oligo-G                  | Vert | 0,09                 | -0,07                     | -0,09                        | 0,11                          | 1,07                     | -0,11                     | -0,10                    | 1,05                      |
|                          | Adia | 0,05                 | -0,05                     | -0,07                        | 0,07                          | 0,54                     | -0,54                     | -0,55                    | 0,55                      |
|                          |      | $A_1 \leftarrow G_2$ | $A_1 \rightarrow {}^oG_2$ | ${}^oG_2 \leftarrow A_3$     | ${}^oG_2 \rightarrow A_3$     | $A_3 \leftarrow G_4$     | $A_3 \rightarrow G_4$     | $G_4 \leftarrow A_5$     | $G_4 \rightarrow A_5$     |
| oligo- ${}^oG$           | Vert | 0,07                 | -0,07                     | -0,10                        | 0,11                          | 1,12                     | -0,14                     | -0,11                    | 1,08                      |
|                          | Adia | 0,07                 | -0,07                     | -0,10                        | 0,10                          | 0,57                     | -0,57                     | -0,56                    | 0,56                      |
|                          |      | $A_1 \leftarrow G_2$ | $A_1 \rightarrow {}^oG_2$ | ${}^oG_2 \leftarrow A_3$     | ${}^oG_2 \rightarrow A_3$     | $A_3 \leftarrow {}^oG_4$ | $A_3 \rightarrow {}^oG_4$ | ${}^oG_4 \leftarrow A_5$ | ${}^oG_4 \rightarrow A_5$ |
| oligo- ${}^oG^oG$        | Vert | 0,08                 | -0,08                     | -0,12                        | 0,13                          | 1,11                     | -0,14                     | -0,11                    | 1,07                      |
|                          | Adia | 0,09                 | -0,08                     | -0,12                        | 0,12                          | 0,58                     | -0,58                     | -0,56                    | 0,56                      |
| Excess electron transfer |      |                      |                           |                              |                               |                          |                           |                          |                           |
|                          |      | $A_1 \leftarrow A_3$ | $A_1 \rightarrow A_3$     | $G_2 \leftarrow G_4$         | $G_2 \rightarrow G_4$         | $A_3 \leftarrow A_5$     | $A_3 \rightarrow A_5$     |                          |                           |
| oligo-G                  | Vert | -0,01                | 0,03                      | 0,46                         | -0,04                         | 0,00                     | 0,01                      |                          |                           |
|                          | Adia | -0,02                | 0,02                      | 0,47                         | -0,47                         | -0,01                    | 0,01                      |                          |                           |
|                          |      | $A_1 \leftarrow A_3$ | $A_1 \rightarrow A_3$     | ${}^oG_2 \leftarrow G_4$     | ${}^oG_2 \rightarrow G_4$     | $A_3 \leftarrow A_5$     | $A_3 \rightarrow A_5$     |                          |                           |
| oligo- ${}^oG$           | Vert | -0,03                | 0,00                      | 0,47                         | -0,04                         | 0,01                     | 0,01                      |                          |                           |
|                          | Adia | -0,03                | 0,03                      | 0,47                         | -0,47                         | 0,01                     | -0,01                     |                          |                           |
|                          |      | $A_1 \leftarrow A_3$ | $A_1 \rightarrow A_3$     | ${}^oG_2 \leftarrow {}^oG_4$ | ${}^oG_2 \rightarrow {}^oG_4$ | $A_3 \leftarrow A_5$     | $A_3 \rightarrow A_5$     |                          |                           |
| oligo- ${}^oG^oG$        | Vert | -0,04                | 0,04                      | 0,46                         | -0,03                         | 0,02                     | 0,00                      |                          |                           |
|                          | Adia | -0,04                | 0,04                      | 0,46                         | -0,46                         | 0,02                     | -0,02                     |                          |                           |

**Table S5a.** The Energies: Ground ( $E^{\text{GR}}$ ) and Excitation ( $E^{\text{EX}}$ ) state energies and Excitation and HOMO Energies as well as corresponding Dipole Moments Ground, Excitation and Transition ( $DM^{\text{G}}$ ,  $DM^{\text{EX}}$ ,  $D_{12}$ ) in Debye of neighbour base pair extracted from selected dimmers of *ds*-oligonucleotides, calculated at the M06-2x/6-31++G\*\* level of theory in the aqueous phase using the DFT or TD-DFT methodology.

| SYSTEM                               | Base Pair Dimer                                 | $E^{\text{GR}}$ | $DM^{\text{GR}}$ | $E^{\text{EX}}$ | $DM^{\text{EX}}$ | Sing.S. $E^{\text{EX}}$ | $E^{\text{HOMO}}$ | $E^{\text{HOMO-1}}$ | $E^{\text{LUMO}}$ | $E^{\text{LUMO-1}}$ |
|--------------------------------------|-------------------------------------------------|-----------------|------------------|-----------------|------------------|-------------------------|-------------------|---------------------|-------------------|---------------------|
| oligo-G                              | A <sub>1</sub>    G <sub>2</sub>                | -1858,467934    | 9,97             | -1858,336047    | 10,31            | 4,92                    | -0,2606           | -0,2786             | -0,0162           | -0,0129             |
|                                      | G <sub>2</sub>    A <sub>3</sub>                | -1858,468344    | 9,29             | -1858,334475    | 9,33             | 5,00                    | -0,2606           | -0,2786             | -0,0162           | -0,0129             |
|                                      | A <sub>3</sub>    G <sub>4</sub>                | -1858,467944    | 10,09            | -1858,334834    | 10,45            | 5,01                    | -0,2590           | -0,2799             | -0,0164           | -0,0115             |
|                                      | G <sub>4</sub>    A <sub>5</sub>                | -1858,468728    | 9,94             | -1858,335837    | 9,92             | 5,06                    | -0,2612           | -0,2824             | -0,0170           | -0,0138             |
| oligo- <sup>o</sup> G                | A <sub>1</sub>    G <sub>2</sub>                | -1858,468443    | 10,06            | -1858,336412    | 10,42            | 4,92                    | -0,2591           | -0,2807             | -0,0156           | -0,0149             |
|                                      | G <sub>2</sub>    A <sub>3</sub>                | -1858,466571    | 9,09             | -1858,332663    | 9,12             | 4,99                    | -0,2619           | -0,2786             | -0,0166           | -0,0129             |
|                                      | A <sub>3</sub>    <sup>oxo</sup> G <sub>4</sub> | -1933,694205    | 16,24            | -1933,568074    | 14,53            | 4,81                    | -0,2519           | -0,2831             | -0,0169           | -0,0121             |
|                                      | <sup>oxo</sup> G <sub>4</sub>    A <sub>5</sub> | -1933,695763    | 16,45            | -1858,335837    | 9,92             | 4,90                    | -0,2532           | -0,2836             | -0,0176           | -0,0142             |
| oligo- <sup>o</sup> G <sup>o</sup> G | A <sub>1</sub>    G <sub>2</sub>                | -1933,694886    | 16,27            | -1933,568844    | 14,53            | 4,43                    | -0,2528           | -0,2830             | -0,0162           | -0,0151             |
|                                      | <sup>oxo</sup> G <sub>2</sub>    A <sub>3</sub> | -1933,692729    | 15,73            | -1933,567003    | 14,06            | 4,94                    | -0,2537           | -0,2796             | -0,0175           | -0,0134             |
|                                      | A <sub>3</sub>    <sup>oxo</sup> G <sub>4</sub> | -1933,694324    | 16,24            | -1933,568137    | 14,53            | 4,83                    | -0,2523           | -0,2827             | -0,0170           | -0,0120             |
|                                      | <sup>oxo</sup> G <sub>4</sub>    A <sub>5</sub> | -1933,695805    | 16,45            | -1933,569079    | 14,77            | 4,90                    | -0,2534           | -0,2835             | -0,0177           | -0,0142             |

**Table S5b.** The Energies: Ground ( $E^{\text{GR}}$ ) and Excitation ( $E^{\text{EX}}$ ) state energies and Excitation and HOMO Energies as well as corresponding Dipole Moments Ground, Excitation and Transition ( $DM^{\text{G}}$ ,  $DM^{\text{EX}}$ ,  $D_{12}$ ) in Debye of distal base pair extracted from selected trimmers of *ds*-oligonucleotides, calculated at the M06-2x/6-31++G\*\* level of theory in the aqueous phase using the DFT or TD-DFT methodology

| SYSTEM                               | Base Pair Dimer                                                | $E^{\text{GR}}$ | $DM^{\text{GR}}$ | $E^{\text{EX}}$ | $DM^{\text{EX}}$ | $D_{12}$ | $E^{\text{HOMO}}$ | $E^{\text{HOMO-1}}$ | $E^{\text{LUMO}}$ | $E^{\text{LUMO-1}}$ |
|--------------------------------------|----------------------------------------------------------------|-----------------|------------------|-----------------|------------------|----------|-------------------|---------------------|-------------------|---------------------|
| oligo-G                              | A <sub>1</sub>    A <sub>3</sub>                               | -1858,467934    | 9,97             | -1858,336047    | 10,31            | 6,40     | -0,25828          | -0,2805             | -0,0151           | -0,01392            |
|                                      | G <sub>2</sub>    G <sub>4</sub>                               | -1858,468344    | 9,29             | -1858,334475    | 9,33             | 11,39    | -0,26062          | -0,27856            | -0,01622          | -0,01292            |
|                                      | A <sub>3</sub>    A <sub>5</sub>                               | -1858,467944    | 10,09            | -1858,334834    | 10,45            | 11,13    | -0,25900          | -0,2799             | -0,01643          | -0,01148            |
| oligo- <sup>o</sup> G                | A <sub>1</sub>    A <sub>3</sub>                               | -1858,468443    | 10,06            | -1858,336412    | 10,42            | 6,17     | -0,25909          | -0,28071            | -0,01555          | -0,01486            |
|                                      | G <sub>2</sub>    <sup>oxo</sup> G <sub>4</sub>                | -1858,466571    | 9,09             | -1858,332663    | 9,12             | 11,64    | -0,26195          | -0,27864            | -0,01665          | -0,01294            |
|                                      | A <sub>3</sub>    A <sub>5</sub>                               | -1933,694205    | 16,24            | -1933,568074    | 14,53            | 3,59     | -0,25192          | -0,28312            | -0,01686          | -0,01208            |
| oligo- <sup>o</sup> G <sup>o</sup> G | A <sub>1</sub>    A <sub>3</sub>                               | -1842,384666    | 3,49             | -1842,250666    | 3,93             | 9,71     | -0,25828          | -0,2805             | -0,0151           | -0,01392            |
|                                      | <sup>oxo</sup> G <sub>4</sub>    <sup>oxo</sup> G <sub>4</sub> | -2024,956101    | 24,37            | -2024,82773     | 22,40            | 7,12     | -0,25658          | -0,25748            | -0,01946          | -0,01558            |
|                                      | A <sub>3</sub>    A <sub>5</sub>                               | -1842,385053    | 3,60             | -1842,251528    | 3,72             | 10,06    | -0,28370          | -0,28676            | -0,01831          | -0,01281            |
